# Supplementary material for: Global and local mechanical properties control endonuclease reactivity of a DNA origami nanostructure
Source: bioRxiv or medRxiv preprint supplement (doi:10.1101/640847), 2020-01-27
Supplement: Supplementary file [file media-3.pdf]

# Supporting Information for “Allosteric modulation of local reactivity in DNA origami”

Antonio Suma, Alex Stopar, Allen W. Nicholson, Matteo Castronovo, and Vincenzo Carnevale

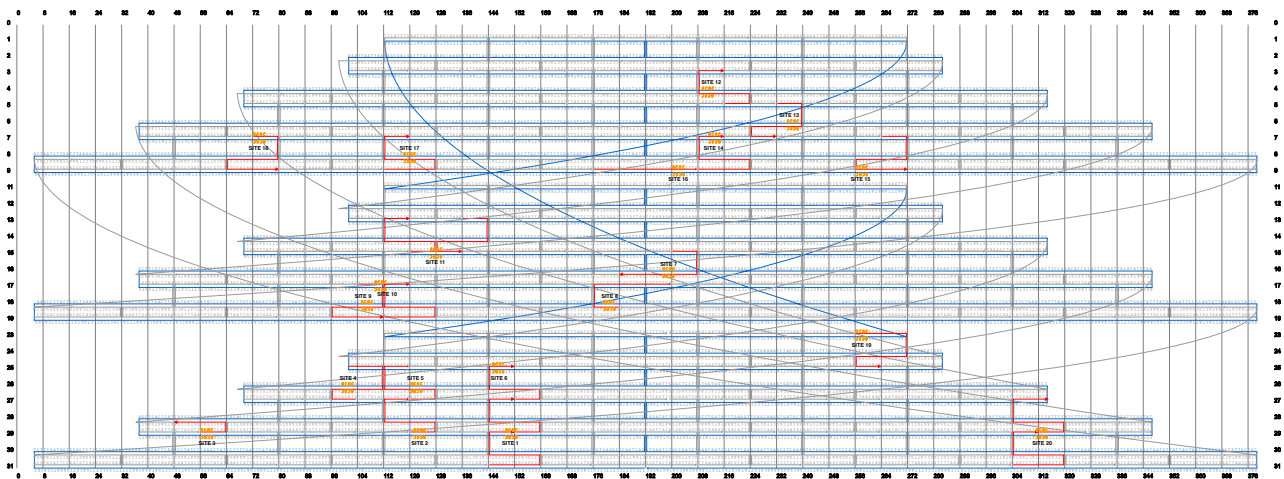

**Supplementary Figure S1:** Cadnano representation of the sharp triangle, with GCGC sites highlighted.

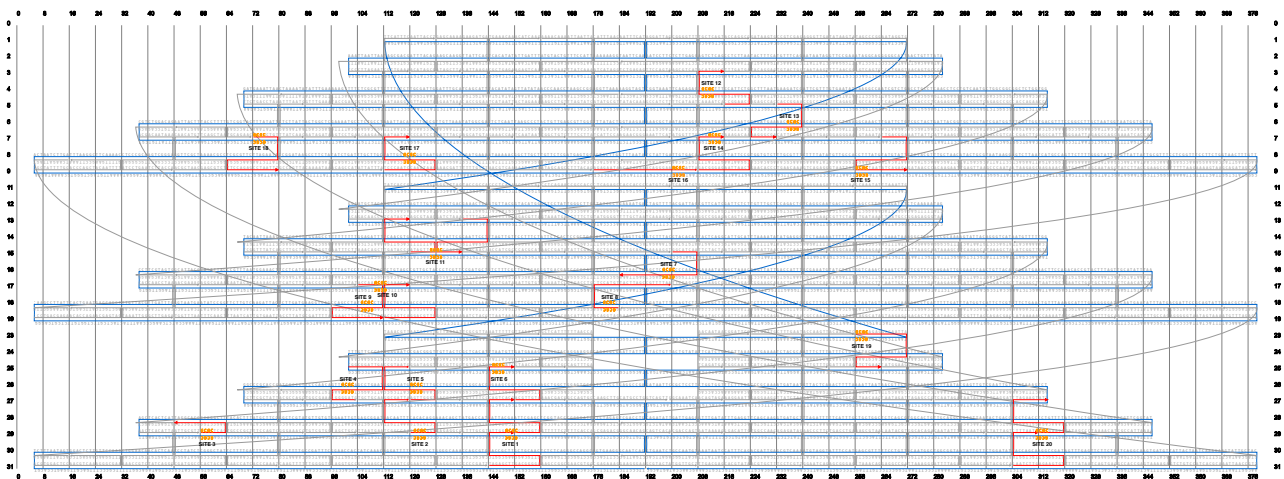

**Supplementary Figure S2:** Same as Fig. S1, but for the defective triangle.

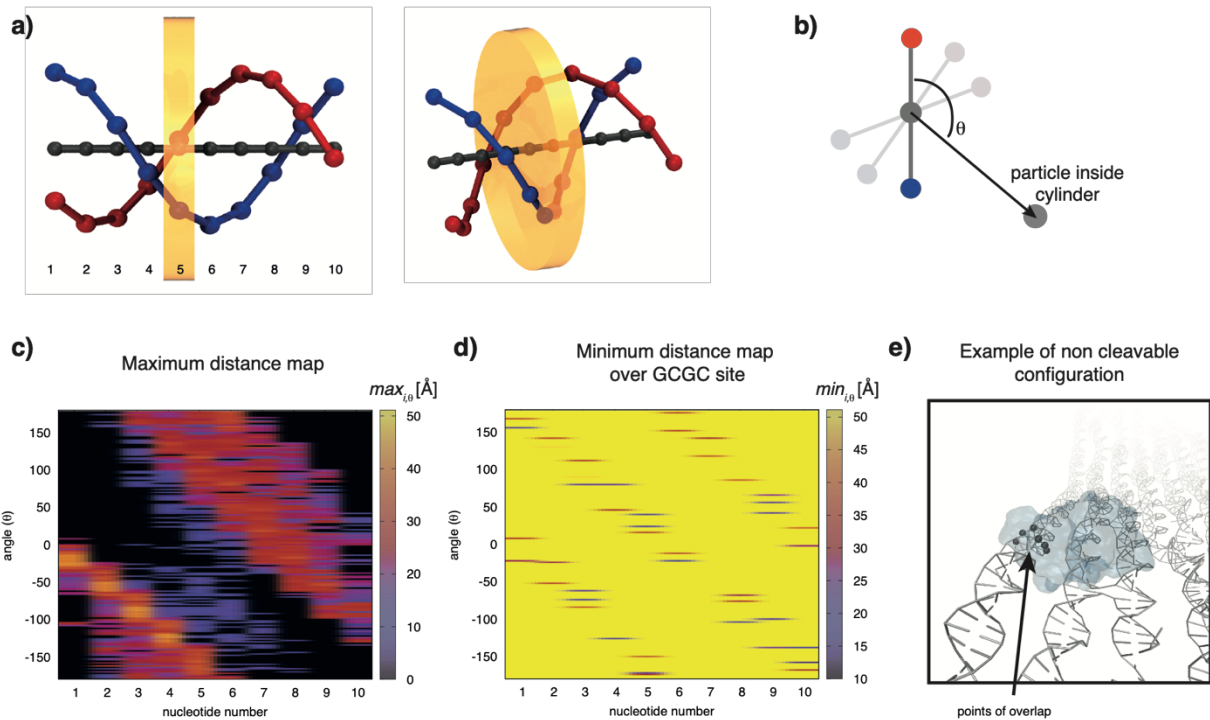

**Supplementary Figure S3:** Geometric criteria used to build the maximum and minimum distance maps. a) A perfect dsDNA of ten bases used as a reference frame. For each of the ten nucleotides, a cylinder centered on the nucleotide is defined with the axis parallel to the DNA centerline, the height equal to the base-to-base distance and infinite radius. Any particle inside the  $i$ -th cylinder is considered when constructing the distance maps for the corresponding nucleotide. To compute the angle  $\theta$ , we use one of the two strands as a reference and compute the angle between its base-pair vector and the particle position vector, see b). Thus, the angular reference frame rotates along the double strand. c) Maximum distance map required by the protein ( $max_{i,\theta}$ ) to dock on the DNA. d) Example of minimum distance map ( $min_{i,\theta}$ ) constructed for site 8 (on the scaffold side), for a single frame. In this case, the comparison between the two maps indicates that the site is not accessible; indeed, there is overlap between the protein residues and one of the adjacent strands, see e).
